# Supplementary material
Source: PubMed Central journal article supplement (PMC2779736)
Supplement: NIHMS150320-supplement-1.pdf [file NIHMS150320-supplement-1.pdf]

## Supplemental Discussion

The following comparison of enrichment methods for targeted sequencing was added at the request of the reviewers to address concerns that the reader be able to compare the performance of the microdroplet PCR enrichment process to other already established methods. We wish to note that each of the published technical studies has selected different targets (with different GC contents and homologs in the genome), have sequenced the captured DNA to different levels of coverage, and have performed different analyses to measure performance. Furthermore, the definition of “target”, “background” and “fraction of reads mapping on target” are used in different contexts in the various technical studies describing enrichment methods. Thus, we recognize that there are limitations to being able to fairly compare performance measures of targeting efficiencies between the different technologies.

### A. Comparison of enrichment methods for targeted sequencing

Here we clearly define “target”, “background” and “fraction of reads mapping on target” used for the microdroplet PCR enrichment method as well as for a recently published hybridization method and a recent publication on molecular inversion probes. In addition to defining these terms for all three technologies we provide published performance measures (Supplemental Table 8).

#### ***Microdroplet PCR***

For the scale-up phase after trimming primer sequences from the amplicons there is a total of 1.35 Mb of targeted bases. The fraction of the 10,603,854 total reads generated that map to the targeted bases is 65.1%. The fraction of targeted bases that are covered by at least 1 base is 99.8%, and the fraction that passes our threshold for calling variants (covered by 5 or more reads and a consensus score for 50 or greater) is 94.5%. The average coverage was 185 and variant concordance based on comparison with 2226 HapMap genotypes was 98.8%. The uniformity of coverage: 96.6% of bases within 25-fold

#### ***Hybridization-based methods***

We use the data from Gnirke et al.<sup>1</sup> for the basis of comparing the Solution Hybridization enrichment method. The study used 22,000 bait sequences of 170 bases in length for a total of 3.74 Mb of targeted bases. The authors report that 321 Mb of the total sequence (851 Mb) and of uniquely mapping sequence (492 Mb) map directly on the bait itself. Due to the fact that Gnirke et al. uses all sequence reads while we use filtered sequence reads for performance measures, direct comparisons is difficult and may result in an underrepresentation for solution

hybridization performance. Therefore to perform this comparison we acquired the hybridization sequence raw data (851 Mb)<sup>2</sup> and mapped back to HG18 using the same analysis methods we used to assess micro-droplet PCR performance. We obtained similar mapping efficiency for the unfiltered reads (523 Mb uniquely mapping to HG18 and 331 Mb uniquely mapping on target) as described in Gnirke et al. with the slight variation due to differing mapping strategies. We filtered the reads assuming the GERALD filter flag is still properly represented in the archive obtaining 524 Mb. Of the filtered reads 439 Mb mapped uniquely to HG18 of which 278 Mb fell on the baited region. Thus, 53.1% (278/524) of the filtered reads mapped on to the baited regions. For all other coverage statistics we used values given in the original paper. The fraction of targeted bases that are covered by at least 1 read is 88.0%, and the fraction that passes the threshold for calling variants (best-to-next-best ratio of  $10^5$  or greater) is 64% of the exonic sequence in the GA-I run and 89% in the GA-II run. The average coverage was 86x and variant concordance based on 7712 HapMap genotypes was 99.6% for the GA-I run, concordance was not reported for the GA-II run. The uniformity of coverage: 80% of bases within 25-fold.

### ***Molecular Inversion probes***

We use the data from Turner et al.<sup>3</sup> for the basis of comparing the Molecular Inversion Probe (MIP) enrichment method. Our comparisons are based on the sequence data generated using the End Sequencing approach (13,000 MIPs), which had greater targeting efficiency than the Shotgun approach (55,000 MIPs). The study used 13,000 MIPs ranging in length from 100-191 bp, which total ~1.7 Mb. However, only 1.4 Mb were considered the targeted bases because 0.3 Mb were not accessible by end sequencing. The MIPs method showed high specificity with 90% of reads mapping on target. However, the study generated 76 bp reads with the first 20 bp of each read corresponding to the MIP primer, thus 56 of the bases are informative.  $90 \times (56/76) = 66.3\%$  = the proportion of reads mapping to targeted bases. The fraction of targeted bases that are covered by at least 1 read is 98.0%, and the fraction that passes the threshold for calling variants (covered by 8 or more reads) is 75%. In Turner et al. there is no direct mention of average sequence depth per sample. We calculate an estimated average coverage of ~224X coverage per sample by multiplying the average number of reads mapping on target (8.4 million reads x 90% mapping on target) by the ratio of the read that was on target (56 bases of 76 bp read) divided by the total sequence captured (1.4 Mb). The variant concordance based on 9489 HapMap genotypes was 99.7%. The uniformity of coverage: 58% of bases with 10-fold and 88% of bases within 100-fold.

## **B. Reduction in DNA requirements for microdroplet PCR**

In the RDT 1000: Merge step described above we started with 4.5 ug of genomic DNA in 20 ul of buffer and divided it evenly into 1.5 million droplets of 14 pl. Each microdroplet thus contains ~3 pg of genomic DNA, corresponding roughly to 1 haploid genome equivalent. Hence, if the amount of starting genomic DNA were to be halved, the number of productive microdroplets would also be halved. However, in some cases, researchers have a need to be able to work with less starting DNA and therefore we have examined the effects of whole genome amplification on data quality and are developing the ability to perform microdroplet PCR with multiple primer pairs in each droplet.

### ***Whole-genome amplification***

The effects of whole-genome amplification (“WGA”) on data quality were examined. Two WGA kits were used for this experiment: Rapisome pWGA Kit (Biohelix, H0300S) which utilizes a primase and helicase for WGA; and REPLI-g Mini kit (Qiagen, 150023) which utilizes random hexamers and phi29 for WGA. 100 ng of input DNA (Coriell HapMap sample NA18858) was amplified according to the manufacturers’ instructions for both kits. Quality of WGA template was assessed by agarose gel electrophoresis, followed by WGA template purification using QIAmp Mini DNA Kit (Qiagen) according to manufacturer’s instructions. Purified WGA DNA samples were then sheared to 2 to 4 kb by nebulization (Invitrogen) using an air pump at 10 psi. Following nebulization, a small aliquot of the sheared samples was assessed by agarose gel electrophoresis to determine correct sizing of the sheared DNA fragments. Sheared WGA samples were then precipitated by isopropyl alcohol precipitation, and the air-dried DNA pellets were resuspended by vigorous pipetting in 1 mM Tris-HCl pH 8.0. Samples were resuspended in 12 µL and DNA concentrations were determined by picogreen fluorescence using 1 µL of the DNA sample.

The purified, sheared WGA DNA templates (4 ug) were amplified using the same 3976 primer pair library and sequence enrichment protocol as used in the scale-up phase alongside unamplified genomic DNA from HapMap sample NA18858. The SNP calls made from the sequencing data were compared with the data in the HapMap database and the two WGA samples had similar call rates (97%) and the same concordance rate (98.7%) as the unamplified genomic sample. These data demonstrate that equivalently accurate SNP calling can be performed using the microdroplet PCR sequence enrichment procedure whether the DNA is unamplified or whole genome amplified.

***Expanded content microdroplet PCR***

Another possibility exists to increase the number of active PCR droplets without increasing the starting amount of template DNA. If one starts with 1/4 of a haploid genome per droplet and includes 4 sets of primer pairs in each of the primer droplets, essentially all of the droplets will generate a single PCR product and 2.0 million active reactions can be achieved from 1.5 ug of input DNA. To demonstrate this, we prepared 21 uL of template buffer solution with 375 ng of template DNA and a 384-member library where each library droplet contains 4 sets of primer pairs; 96 different types of droplets. Gel electrophoresis curves indicate that the yield is consistent with what is expected if all droplets are producing a single amplification product.

Additionally, we generated a 1536 primer pair droplet library such that each of 384 different types of droplets contained four primer pairs. The procedure for generating the library was identical to the procedure used for the library generation described above except that four primer pairs instead of one were mixed in the solutions used to generate the library droplets. The 1536 primer pair library was merged with Coriell sample NA18858 using the sequence enrichment procedure under the same conditions as described in the corresponding section above. The sample was sequenced on an Illumina GAI instrument and the sequencing data was used to make SNP calls. The SNP calls were compared to those in the HapMap database. The concordant rate for the droplets containing 4 sets of primers was similar (98.8%) as for the individually encapsulated primers (98.7%). This data demonstrates that using up to 4 primer pairs in the droplet library does not affect the performance of primer droplet libraries while allowing a significant decrease in required template. When the expanded content format is scaled to 5 to 10 primer pairs in each droplet we anticipate that the current libraries with 4000 types of primer droplets will be sufficient to capture 20,000 to 40,000 amplicons representing 1/10th to 1/5th of the exome.

## References

1. Gnirke, A. et al. Solution hybrid selection with ultra-long oligonucleotides for massively parallel targeted sequencing. *Nat Biotechnol* **27**, 182-189 (2009).
2. [http://www.broadinstitute.org/annotation/hybrid\\_selection/hybrid\\_selection.html](http://www.broadinstitute.org/annotation/hybrid_selection/hybrid_selection.html).
3. Turner, E.H., Lee, C., Ng, S.B., Nickerson, D.A. & Shendure, J. Massively parallel exon capture and library-free resequencing across 16 genomes. *Nat Methods*, 1-2 (2009).

## Supplemental Figure 1.

**Microfluidic nozzle for generation of primer pair droplets.** An aqueous solution of the forward and reverse primers for a single amplicon is infused through channel (a) into the nozzle where opposing streams of a fluorocarbon oil (b) and (c) focus the flow through the orifice to generate uniform primer droplets.

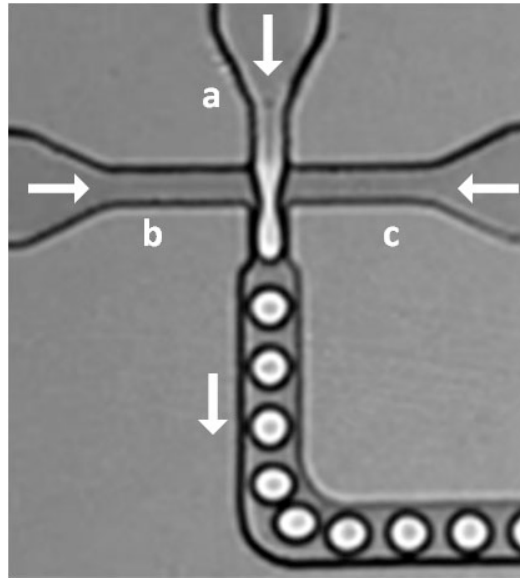

## Supplemental Figure 2.

**Primer Library Quality Control for the validation phase 457 amplicon and the scale-up phase 3976 amplicon libraries.** Primer libraries are tested for primer pair droplet size and uniformity as well as library element representation within the primer library. **(a)** droplet size and uniformity data for the validation phase 457 amplicon library: Avg. droplet volume = 8.3 pL, CV = 3.4%. **(b)** library element representation data within the validation phase 457 amplicon library: Min = 16069; Max = 17574; Avg. = 16773; Std. Dev. = 239.523; CV = 8.9% **(c)** droplet size and uniformity data for the scale-up phase 3976 amplicon library: Avg. droplet volume = 8.2 pL, CV = 4.4%. **(d)** library element representation data within the scale-up phase 3976 amplicon library: Min = 14653; Max = 15323 Avg. = 15084; Std. Dev. = 93.84; CV = 3.6%.

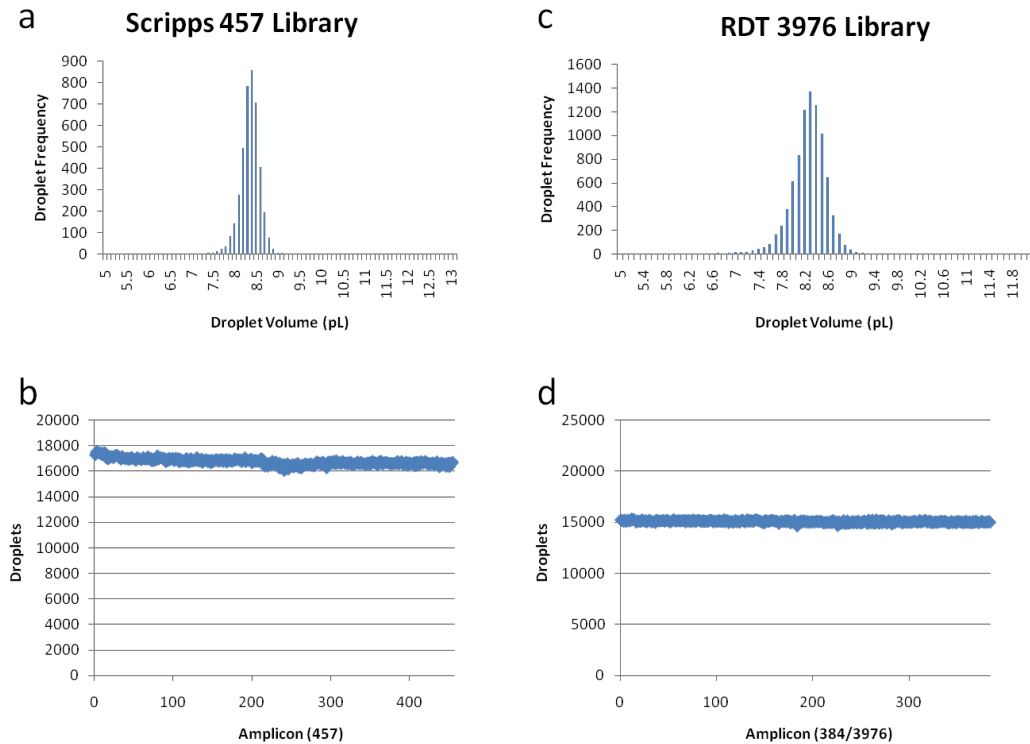

### Supplemental Figure 3

**Processing droplets in a microfluidic chip.** The optical image shows all key microfluidic elements for processing droplets. These include: **(a)** Spacing of the Library droplets with carrier-oil. **(b)** Generation of Template droplets of uniform size. **(c)** One-to-one pairing of Template and Library droplets. Pairing is achieved by actively matching the rate of library droplet introduction to the rate of template droplet generation and by using the property that small droplets move faster than large droplets and will catch-up to the preceding large droplet. **(d)** Merging of Template and Library droplets by field-induced coalescence to make individual PCR droplets. **(e)** PCR droplets are transported to a collect line. **(f)** PCR droplets are collected off chip into a standard 0.2 ml PCR tube. Enlarged regions of the image show: **(a)** library droplets before they are spaced, **(b)** template droplets being generated and **(d)** the region where droplets merge in an electric field.

The PCR droplet generation can be viewed in the attached movie (Supplemental Movie 1).

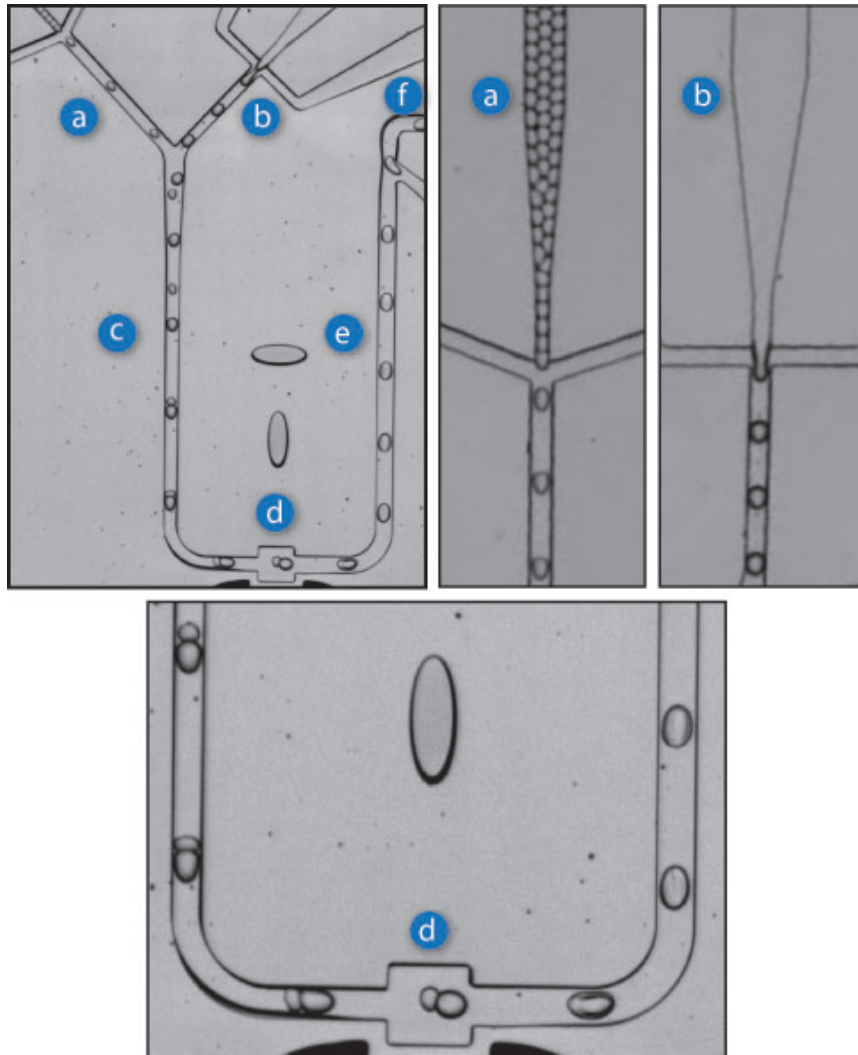



## Supplemental Figure 4

### HapMap Sequence traces for discordant alleles in the ENCODE regions.

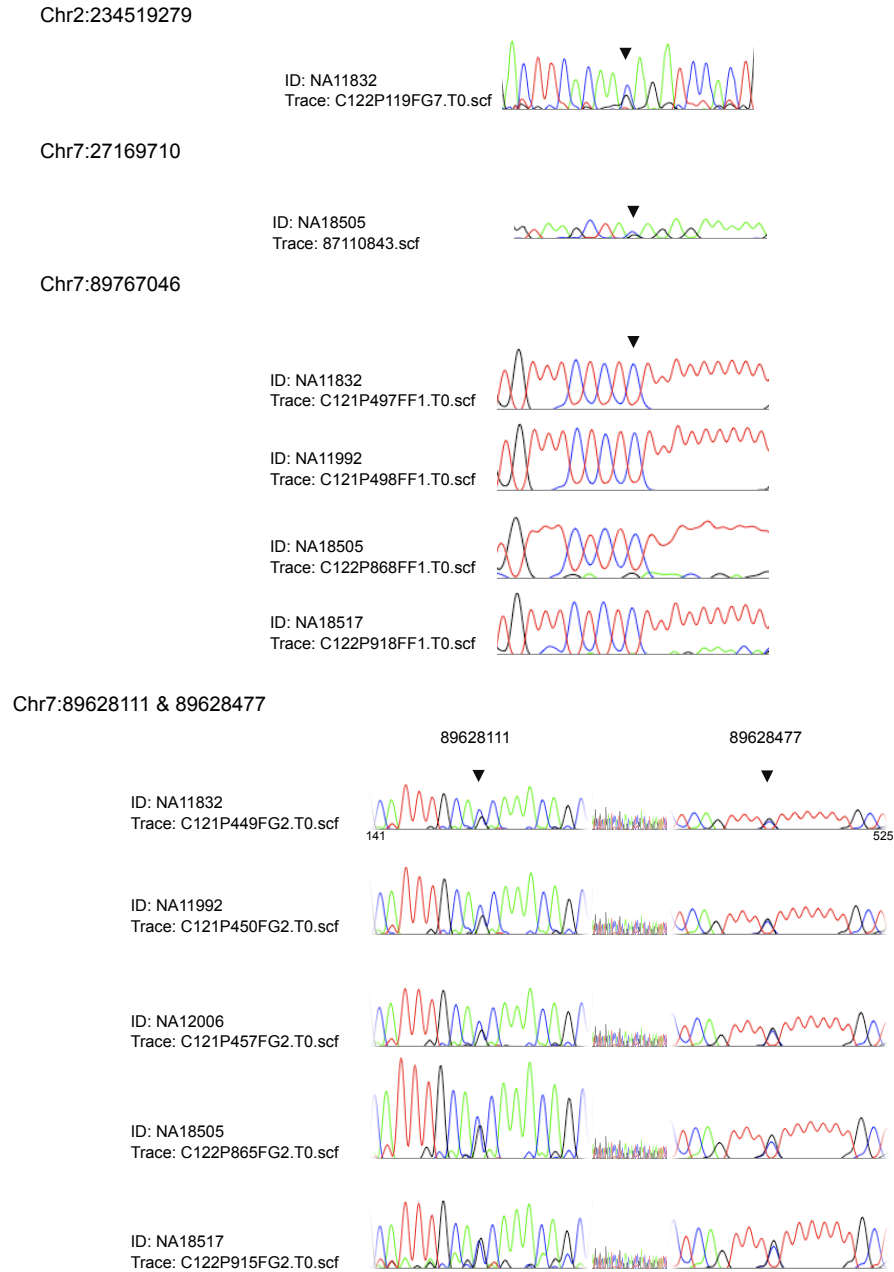

## Supplemental Figure 5

**Effect of GC% and amplicon length on average sequence coverage.** Average sequence coverage of the primer trimmed amplicons for the 456 amplicons in the validation phase (A,B) and 3976 amplicons in the scale-up phase (C,D) plotted against the full amplicons GC% (A,C) and length (B,D).

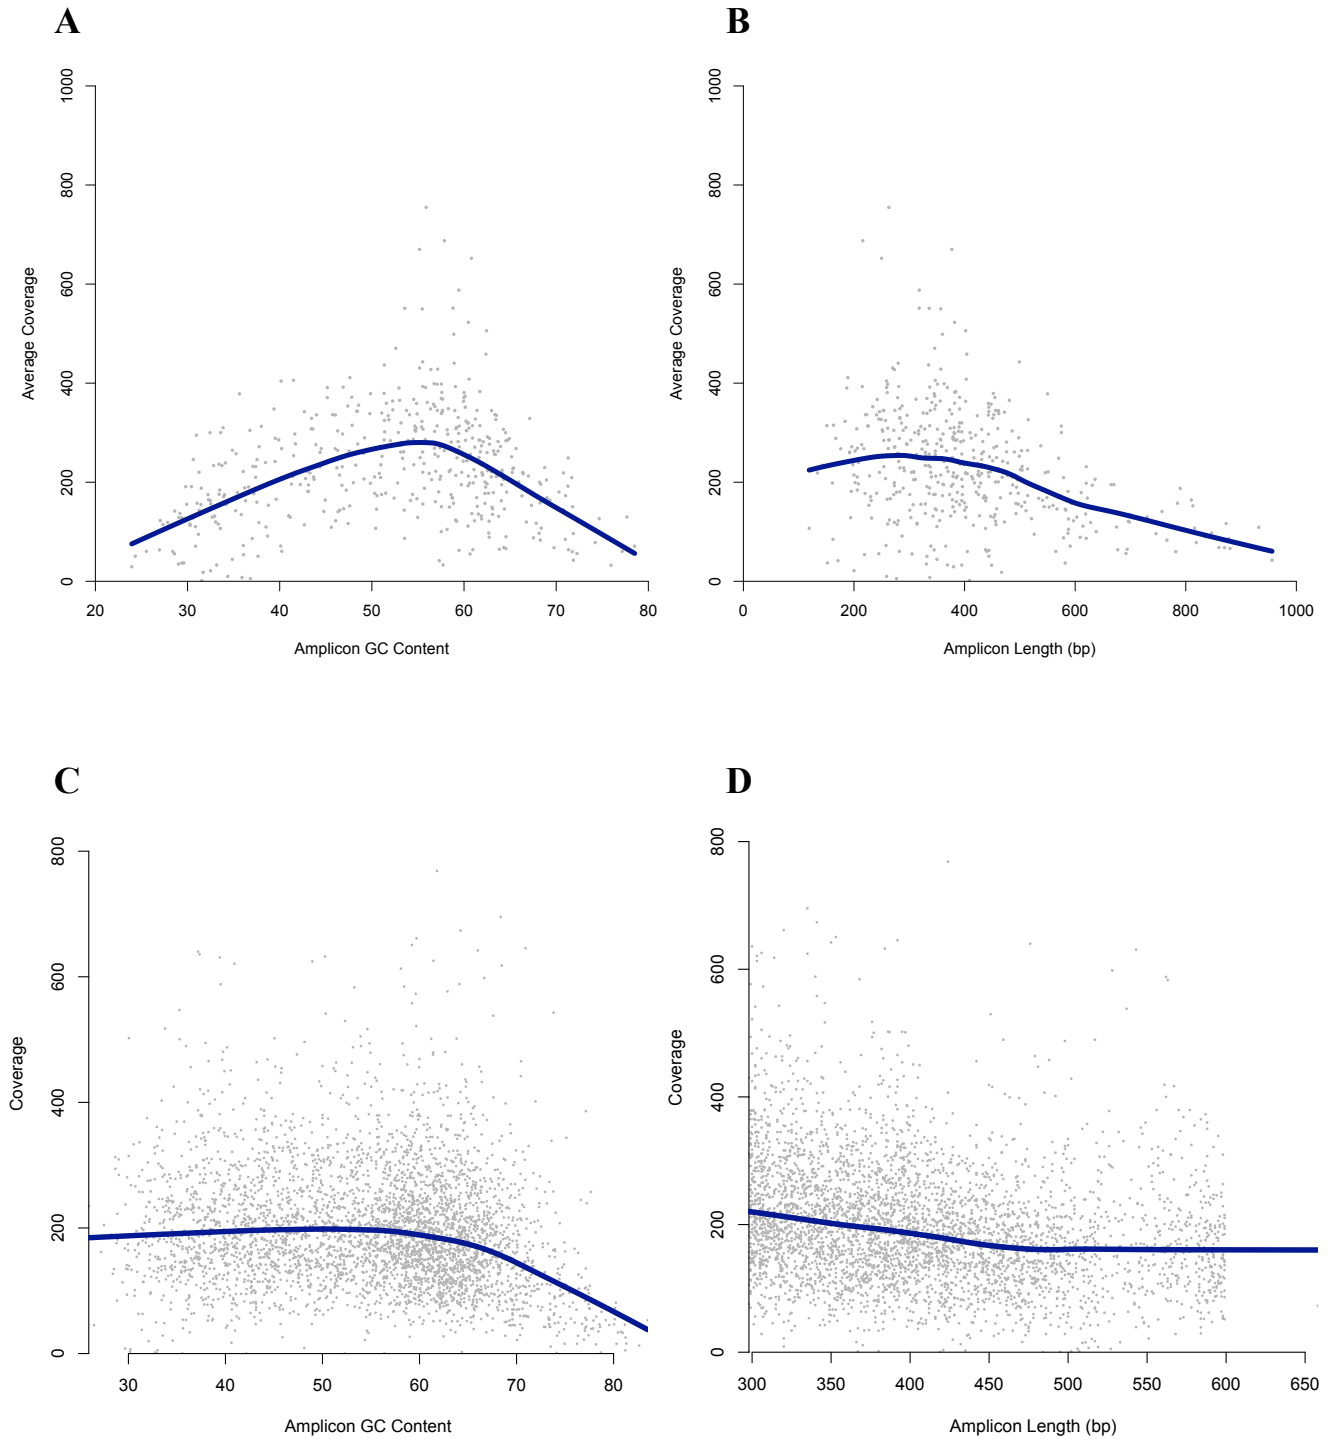

**Supplemental Table 1. Summary of targeted genes in Validation Phase.** In total, 435 exons from 47 genes were targeted. The 435 exons were split into 457 amplicons, each under 1 kb in total length (Supplemental Methods).

| Chr.  | Gene     | No. Exon | No. Amplicon | Median Size (bp) | Size Range (bp) | Category               |
|-------|----------|----------|--------------|------------------|-----------------|------------------------|
| Chr2  | HJURP    | 9        | 11           | 358              | 135-814         | ENCODE                 |
| Chr2  | UGT1A10  | 5        | 6            | 444              | 362-604         | ENCODE                 |
| Chr7  | C7orf63  | 22       | 22           | 344.5            | 193-583         | ENCODE                 |
| Chr7  | CLDN12   | 1        | 2            | 627.5            | 623-632         | ENCODE                 |
| Chr7  | EVX1     | 3        | 3            | 767              | 589-783         | ENCODE                 |
| Chr7  | GTPBP10  | 8        | 8            | 335              | 153-479         | ENCODE                 |
| Chr7  | HOXA1    | 2        | 3            | 584              | 580-589         | ENCODE                 |
| Chr7  | HOXA2    | 2        | 3            | 621              | 583-697         | ENCODE                 |
| Chr7  | HOXA3    | 2        | 3            | 700              | 699-861         | ENCODE                 |
| Chr7  | HOXA4    | 2        | 3            | 621              | 522-747         | ENCODE                 |
| Chr7  | HOXA5    | 2        | 2            | 658              | 621-695         | ENCODE                 |
| Chr7  | HOXA6    | 2        | 2            | 576              | 554-598         | ENCODE                 |
| Chr7  | HOXA7    | 2        | 2            | 527.5            | 445-610         | ENCODE                 |
| Chr7  | HOXA9    | 2        | 2            | 690.5            | 500-881         | ENCODE                 |
| Chr7  | HOXA10   | 3        | 4            | 575.5            | 375-693         | ENCODE                 |
| Chr7  | HOXA11   | 2        | 3            | 434              | 360-588         | ENCODE                 |
| Chr7  | HOXA13   | 2        | 3            | 566              | 499-957         | ENCODE                 |
| Chr7  | STEAP1   | 4        | 4            | 450              | 246-879         | ENCODE                 |
| Chr7  | STEAP2   | 6        | 6            | 528              | 220-676         | ENCODE                 |
| Chr9  | C9orf106 | 1        | 2            | 510.5            | 445-576         | ENCODE                 |
| Chr9  | CRAT     | 14       | 14           | 349              | 152-444         | ENCODE                 |
| Chr9  | NUP188   | 44       | 44           | 336              | 177-516         | ENCODE                 |
| Chr9  | DOLPP1   | 8        | 8            | 317              | 235-461         | ENCODE                 |
| Chr9  | FAM73B   | 15       | 15           | 380              | 242-539         | ENCODE                 |
| Chr9  | IER5L    | 1        | 3            | 731              | 515-820         | ENCODE                 |
| Chr9  | PHYHD1   | 11       | 11           | 284              | 120-391         | ENCODE                 |
| Chr9  | PPP2R4   | 11       | 11           | 338              | 188-588         | ENCODE                 |
| Chr9  | SH3GLB2  | 11       | 11           | 383              | 209-592         | ENCODE                 |
| Chr11 | APOA1    | 3        | 4            | 488.5            | 221-568         | Haemostatis/Thrombosis |
| Chr16 | CETP     | 16       | 16           | 362.5            | 162-457         | Haemostatis/Thrombosis |
| Chr5  | F2R      | 2        | 3            | 874              | 401-933         | Haemostatis/Thrombosis |
| Chr17 | GP1BA    | 1        | 4            | 711.5            | 576-791         | Haemostatis/Thrombosis |
| Chr1  | LRP8     | 19       | 19           | 396              | 164-678         | Haemostatis/Thrombosis |
| Chr20 | PLTP     | 15       | 15           | 297              | 216-418         | Haemostatis/Thrombosis |
| Chr2  | PROC     | 8        | 8            | 393              | 163-848         | Haemostatis/Thrombosis |
| Chr20 | PROCR    | 4        | 4            | 402.5            | 347-561         | Haemostatis/Thrombosis |
| Chr20 | THBD     | 1        | 3            | 836              | 817-871         | Haemostatis/Thrombosis |
| Chr9  | UGCG     | 9        | 9            | 392              | 308-473         | Haemostatis/Thrombosis |
| Chr8  | TRPA1    | 27       | 27           | 329              | 197-504         | TRP Channels           |
| Chr4  | TRPC3    | 11       | 12           | 451              | 330-666         | TRP Channels           |
| Chr11 | TRPM5    | 24       | 24           | 400              | 262-542         | TRP Channels           |
| Chr2  | TRPM8    | 24       | 24           | 347              | 209-671         | TRP Channels & ENCODE  |
| Chr17 | TRPV1    | 15       | 15           | 439              | 281-639         | TRP Channels           |
| Chr17 | TRPV2    | 14       | 14           | 400              | 172-612         | TRP Channels           |
| Chr17 | TRPV3    | 17       | 17           | 349              | 144-515         | TRP Channels           |
| Chr12 | TRPV4    | 15       | 15           | 396              | 193-620         | TRP Channels           |
| Chr12 | PAH      | 13       | 13           | 330              | 168-462         | Phenylketonuria        |
| Total | 47       | 435      | 457          | 434              | 120-957         |                        |

**Supplemental Table 2. Primer Design Strategy for Validation Phase.** The primer sets were designed using five stages. The parameters used in the first stage were the most stringent and were loosened in the following stages to allow for primer design of all 457 amplicons (Supplemental Methods).

| Stage |           | Masking |     | Padding<br>Sequence (bp) | Primer3 Parameter*<br>Tm (°C) | Number of Primer Sets |        |       |           |   |   |     |           |     |    |           |   |   |       |           |   |   |     |           |     |   |           |   |   |       |           |   |   |     |           |     |   |           |   |   |       |           |   |   |     |           |     |   |           |   |   |       |  |  |
|-------|-----------|---------|-----|--------------------------|-------------------------------|-----------------------|--------|-------|-----------|---|---|-----|-----------|-----|----|-----------|---|---|-------|-----------|---|---|-----|-----------|-----|---|-----------|---|---|-------|-----------|---|---|-----|-----------|-----|---|-----------|---|---|-------|-----------|---|---|-----|-----------|-----|---|-----------|---|---|-------|--|--|
|       |           | Repeat  | SNP |                          |                               | Designed              | Failed |       |           |   |   |     |           |     |    |           |   |   |       |           |   |   |     |           |     |   |           |   |   |       |           |   |   |     |           |     |   |           |   |   |       |           |   |   |     |           |     |   |           |   |   |       |  |  |
| 1     | 5'-primer | +       | +   | 200                      | 59.5-60.5                     | 424                   | 33     |       |           |   |   |     |           |     |    |           |   |   |       |           |   |   |     |           |     |   |           |   |   |       |           |   |   |     |           |     |   |           |   |   |       |           |   |   |     |           |     |   |           |   |   |       |  |  |
|       | 3'-primer | +       | +   |                          |                               |                       |        | 2     | 5'-primer | + | + | 200 | 59.5-60.5 | 10  | 23 | 3'-primer | - | + | 3     | 5'-primer | - | + | 200 | 59.5-60.5 | 17  | 6 | 3'-primer | + | + | 4     | 5'-primer | + | + | 300 | 57.5-62.5 | 5   | 1 | 3'-primer | - | + | 5     | 5'-primer | - | + | 300 | 57.5-62.5 | 1   | 0 | 3'-primer | + | + | Total |  |  |
| 2     | 5'-primer | +       | +   | 200                      | 59.5-60.5                     | 10                    | 23     |       |           |   |   |     |           |     |    |           |   |   |       |           |   |   |     |           |     |   |           |   |   |       |           |   |   |     |           |     |   |           |   |   |       |           |   |   |     |           |     |   |           |   |   |       |  |  |
|       | 3'-primer | -       | +   |                          |                               |                       |        | 3     | 5'-primer | - | + | 200 | 59.5-60.5 | 17  | 6  | 3'-primer | + | + | 4     | 5'-primer | + | + | 300 | 57.5-62.5 | 5   | 1 | 3'-primer | - | + | 5     | 5'-primer | - | + | 300 | 57.5-62.5 | 1   | 0 | 3'-primer | + | + | Total |           |   |   |     |           | 457 |   |           |   |   |       |  |  |
| 3     | 5'-primer | -       | +   | 200                      | 59.5-60.5                     | 17                    | 6      |       |           |   |   |     |           |     |    |           |   |   |       |           |   |   |     |           |     |   |           |   |   |       |           |   |   |     |           |     |   |           |   |   |       |           |   |   |     |           |     |   |           |   |   |       |  |  |
|       | 3'-primer | +       | +   |                          |                               |                       |        | 4     | 5'-primer | + | + | 300 | 57.5-62.5 | 5   | 1  | 3'-primer | - | + | 5     | 5'-primer | - | + | 300 | 57.5-62.5 | 1   | 0 | 3'-primer | + | + | Total |           |   |   |     |           | 457 |   |           |   |   |       |           |   |   |     |           |     |   |           |   |   |       |  |  |
| 4     | 5'-primer | +       | +   | 300                      | 57.5-62.5                     | 5                     | 1      |       |           |   |   |     |           |     |    |           |   |   |       |           |   |   |     |           |     |   |           |   |   |       |           |   |   |     |           |     |   |           |   |   |       |           |   |   |     |           |     |   |           |   |   |       |  |  |
|       | 3'-primer | -       | +   |                          |                               |                       |        | 5     | 5'-primer | - | + | 300 | 57.5-62.5 | 1   | 0  | 3'-primer | + | + | Total |           |   |   |     |           | 457 |   |           |   |   |       |           |   |   |     |           |     |   |           |   |   |       |           |   |   |     |           |     |   |           |   |   |       |  |  |
| 5     | 5'-primer | -       | +   | 300                      | 57.5-62.5                     | 1                     | 0      |       |           |   |   |     |           |     |    |           |   |   |       |           |   |   |     |           |     |   |           |   |   |       |           |   |   |     |           |     |   |           |   |   |       |           |   |   |     |           |     |   |           |   |   |       |  |  |
|       | 3'-primer | +       | +   |                          |                               |                       |        | Total |           |   |   |     |           | 457 |    |           |   |   |       |           |   |   |     |           |     |   |           |   |   |       |           |   |   |     |           |     |   |           |   |   |       |           |   |   |     |           |     |   |           |   |   |       |  |  |
| Total |           |         |     |                          |                               | 457                   |        |       |           |   |   |     |           |     |    |           |   |   |       |           |   |   |     |           |     |   |           |   |   |       |           |   |   |     |           |     |   |           |   |   |       |           |   |   |     |           |     |   |           |   |   |       |  |  |

\*Primer length was kept constant at 18-27 bp.











**Supplemental Table 4. Coverage statistics per sample for validation phase.**

Percentage of all bases that had a sequence depth of 1/5 the mean coverage or greater, less than 5 times the mean, and fell between 1/5 and 5 times the mean.

| Sample               | PCR Method   | Mean Coverage | Proportion of Mapped Bases |          |             |
|----------------------|--------------|---------------|----------------------------|----------|-------------|
|                      |              |               | >1/5 Mean                  | <5x Mean | > 1/5 & <5x |
| NA11832              | Traditional  | 294           | 93.5%                      | 100%     | 93.5%       |
| NA11832              | Microdroplet | 274           | 89.93%                     | 99.91%   | 89.83%      |
| NA11992              | Traditional  | 235           | 92.78%                     | 99.96%   | 92.73%      |
| NA11992              | Microdroplet | 188           | 89.95%                     | 99.98%   | 89.93%      |
| NA12006              | Traditional  | 247           | 93.46%                     | 100%     | 93.46%      |
| NA12006              | Microdroplet | 186           | 90.08%                     | 99.98%   | 90.06%      |
| NA18505              | Traditional  | 242           | 91.16%                     | 99.97%   | 91.13%      |
| NA18505              | Microdroplet | 193           | 90.03%                     | 99.96%   | 89.99%      |
| NA18517 <sup>a</sup> | Traditional  | 165           | 91.06%                     | 99.91%   | 90.97%      |
| NA18517 <sup>a</sup> | Microdroplet | 82            | 89.14%                     | 99.98%   | 89.11%      |
| NA18489              | Traditional  | 271           | 94.88%                     | 99.98%   | 94.86%      |
| NA18489              | Microdroplet | 342           | 91.77%                     | 99.9%    | 91.67%      |

a - NA18517 had fewer reads than the other 5 samples for both traditional and microdroplet PCR. This

**Supplemental Table 5. Discordant variants between sequence data and HapMap genotypes in validation phase.**

| Method       | Sample  | Chr | Position              | Reference Allele | HapMap Alleles |          | Sequencing Alleles |          | Variant Quality | Neighbor Quality | Base Frequency <sup>a</sup> | Amplicon      | Amplicon <sup>d</sup> |
|--------------|---------|-----|-----------------------|------------------|----------------|----------|--------------------|----------|-----------------|------------------|-----------------------------|---------------|-----------------------|
|              |         |     |                       |                  | A              | B        | A                  | B        |                 |                  |                             |               |                       |
| Microdroplet | NA11832 | 2   | 234519279             | G                | G              | G        | <b>C</b>           | <b>G</b> | 213             | 62               | 46.31                       | TRPM8_6_1     |                       |
| Traditional  | NA11832 | 2   | 234519279             | G                | G              | G        | <b>C</b>           | <b>G</b> | 209             | 62               | 52.12                       | TRPM8_6_1     |                       |
| Microdroplet | NA18505 | 7   | 27169710 <sup>c</sup> | C                | <b>C</b>       | <b>G</b> | C                  | C        | 49              | 40               | 65.91                       | HOXA9_1_1     |                       |
| Microdroplet | NA11832 | 7   | 89628111              | C                | G              | G        | <b>C</b>           | <b>C</b> | 209             | 62               | 90.43                       | STEAP1_2_1    |                       |
| Traditional  | NA11832 | 7   | 89628111              | C                | G              | G        | <b>C</b>           | <b>C</b> | 255             | 62               | 80.33                       | STEAP1_2_1    |                       |
| Microdroplet | NA11992 | 7   | 89628111              | C                | G              | G        | <b>C</b>           | <b>C</b> | 165             | 62               | 80.34                       | STEAP1_2_1    |                       |
| Traditional  | NA11992 | 7   | 89628111              | C                | G              | G        | <b>C</b>           | <b>C</b> | 255             | 62               | 84                          | STEAP1_2_1    |                       |
| Microdroplet | NA12006 | 7   | 89628111              | C                | G              | G        | <b>C</b>           | <b>C</b> | 255             | 62               | 90.79                       | STEAP1_2_1    |                       |
| Traditional  | NA12006 | 7   | 89628111              | C                | G              | G        | <b>C</b>           | <b>C</b> | 255             | 62               | 86.08                       | STEAP1_2_1    |                       |
| Microdroplet | NA11832 | 7   | 89628477              | C                | G              | G        | <b>C</b>           | <b>C</b> | 255             | 62               | 100                         | STEAP1_2_1    |                       |
| Traditional  | NA11832 | 7   | 89628477              | C                | G              | G        | <b>C</b>           | <b>C</b> | 255             | 62               | 94.37                       | STEAP1_2_1    |                       |
| Microdroplet | NA11992 | 7   | 89628477              | C                | G              | G        | <b>C</b>           | <b>C</b> | 255             | 62               | 100                         | STEAP1_2_1    |                       |
| Traditional  | NA11992 | 7   | 89628477              | C                | G              | G        | <b>C</b>           | <b>C</b> | 255             | 62               | 98.19                       | STEAP1_2_1    |                       |
| Microdroplet | NA12006 | 7   | 89628477              | C                | G              | G        | <b>C</b>           | <b>C</b> | 255             | 62               | 99.21                       | STEAP1_2_1    |                       |
| Traditional  | NA12006 | 7   | 89628477              | C                | G              | G        | <b>C</b>           | <b>C</b> | 255             | 62               | 97.08                       | STEAP1_2_1    |                       |
| Microdroplet | NA18505 | 7   | 89628477              | C                | G              | G        | <b>C</b>           | <b>C</b> | 199             | 62               | 100                         | STEAP1_2_1    |                       |
| Traditional  | NA18505 | 7   | 89628477              | C                | G              | G        | <b>C</b>           | <b>C</b> | 255             | 62               | 97.25                       | STEAP1_2_1    |                       |
| Microdroplet | NA18517 | 7   | 89628477              | C                | G              | G        | <b>C</b>           | <b>C</b> | 202             | 62               | 100                         | STEAP1_2_1    |                       |
| Traditional  | NA18517 | 7   | 89628477              | C                | G              | G        | <b>C</b>           | <b>C</b> | 255             | 62               | 96                          | STEAP1_2_1    |                       |
| Microdroplet | NA11832 | 7   | 89767046              | C                | C              | T        | <b>C</b>           | <b>C</b> | 255             | 62               | 93.57                       | FLJ21062_17_1 |                       |
| Traditional  | NA11832 | 7   | 89767046              | C                | C              | T        | <b>C</b>           | <b>C</b> | 255             | 62               | 89.93                       | FLJ21062_17_1 |                       |
| Microdroplet | NA11992 | 7   | 89767046              | C                | C              | T        | <b>C</b>           | <b>C</b> | 140             | 62               | 88.52                       | FLJ21062_17_1 |                       |
| Traditional  | NA11992 | 7   | 89767046              | C                | C              | T        | <b>C</b>           | <b>C</b> | 127             | 62               | 92.73                       | FLJ21062_17_1 |                       |
| Microdroplet | NA18505 | 7   | 89767046              | C                | C              | T        | <b>C</b>           | <b>C</b> | 54              | 56               | 81.48                       | FLJ21062_17_1 |                       |
| Traditional  | NA18505 | 7   | 89767046              | C                | C              | T        | <b>C</b>           | <b>C</b> | 84              | 62               | 94.12                       | FLJ21062_17_1 |                       |
| Microdroplet | NA18517 | 7   | 89767046              | C                | C              | T        | <b>C</b>           | <b>C</b> | 86              | 62               | 96.43                       | FLJ21062_17_1 |                       |
| Traditional  | NA18517 | 7   | 89767046              | C                | C              | T        | <b>C</b>           | <b>C</b> | 96              | 62               | 85.07                       | FLJ21062_17_1 |                       |
| Microdroplet | NA11832 | 8   | 73104764              | G                | G              | T        | T                  | T        | 177             | 62               | 18.71                       | TRPA1_4_1     |                       |
| Traditional  | NA11832 | 8   | 73104764              | G                | G              | T        | T                  | T        | 112             | 62               | 9.52                        | TRPA1_4_1     |                       |
| Microdroplet | NA12006 | 8   | 73104764              | G                | G              | T        | T                  | T        | 132             | 62               | 14.43                       | TRPA1_4_1     |                       |
| Traditional  | NA12006 | 8   | 73104764              | G                | G              | T        | T                  | T        | 102             | 62               | 8.16                        | TRPA1_4_1     |                       |
| Traditional  | NA18517 | 8   | 73134059 <sup>c</sup> | T                | G              | T        | T                  | T        | 65              | 22               | 79.22                       | TRPA1_20_1    |                       |
| Microdroplet | NA18505 | 9   | 130979840             | G                | A              | A        | G                  | G        | 205             | 62               | 98.59                       | IER5L_1_2     | IER5L_1_3             |
| Traditional  | NA18505 | 9   | 130979840             | G                | A              | A        | G                  | G        | 57              | 50               | 100                         | IER5L_1_2     | IER5L_1_3             |
| Microdroplet | NA18517 | 11  | 2396484               | G                | G              | G        | A                  | G        | 167             | 62               | 41.82                       | TRPM5_20_1    |                       |
| Traditional  | NA18517 | 11  | 2396484               | G                | G              | G        | A                  | G        | 165             | 62               | 52.5                        | TRPM5_20_1    |                       |
| Microdroplet | NA11832 | 12  | 101764760             | C                | C              | C        | A                  | C        | 187             | 62               | 50.28                       | PAH_5_1       |                       |
| Traditional  | NA11832 | 12  | 101764760             | C                | C              | C        | A                  | C        | 138             | 62               | 52.45                       | PAH_5_1       |                       |
| Microdroplet | NA11992 | 12  | 101764760             | C                | C              | C        | A                  | C        | 143             | 62               | 50.4                        | PAH_5_1       |                       |
| Traditional  | NA11992 | 12  | 101764760             | C                | C              | C        | A                  | C        | 121             | 62               | 49.15                       | PAH_5_1       |                       |
| Microdroplet | NA18505 | 12  | 101764760             | C                | C              | C        | A                  | C        | 176             | 62               | 53.28                       | PAH_5_1       |                       |
| Traditional  | NA18505 | 12  | 101764760             | C                | C              | C        | A                  | C        | 149             | 62               | 44.35                       | PAH_5_1       |                       |
| Microdroplet | NA18489 | 16  | 55562390              | G                | A              | G        | G                  | G        | 255             | 62               | 98.27                       | CETP_6_1      |                       |
| Traditional  | NA18489 | 16  | 55562390              | G                | A              | G        | G                  | G        | 255             | 62               | 97.88                       | CETP_6_1      |                       |

**a** - Frequency of reads mapped that contains the reference allele. **b** - class 1: homozygote reference by PCR, homozygote alternate in HapMap, class 2: heterozygote by PCR, homozygote reference in HapMap, class3: homozygote reference by PCR, heterozygote in HapMap. **c** - For variants at both 27169710 and 73134059 the PCR method not shown produced a no call at the position. **d** - Variants amplified by two PCR primer pairs

Supplemental Table 6. False positives in validation phase.

| Chr | Position  | Position  | Method       | Sample  | Reference Allele |   | HapMap Alleles |   | Sequencing Alleles |   |
|-----|-----------|-----------|--------------|---------|------------------|---|----------------|---|--------------------|---|
|     |           |           |              |         | Allele           | A | B              | A | B                  |   |
|     |           |           |              |         |                  |   |                |   |                    | A |
| 2   | 234210504 | 234210504 | Microdroplet | NA18517 | T                | T | T              | C | T                  |   |
| 2   | 234210504 |           | Traditional  | NA18517 | T                | T | T              | C | T                  |   |
| 2   | 234341152 | 234341152 | Microdroplet | NA18505 | T                | T | T              | C | T                  |   |
| 2   | 234341152 |           | Traditional  | NA18505 | T                | T | T              | C | T                  |   |
| 2   | 234345991 | 234345991 | Traditional  | NA11992 | T                | T | T              | C | T                  |   |
| 2   | 234414008 | 234414008 | Microdroplet | NA18517 | G                | G | G              | A | G                  |   |
| 2   | 234414008 |           | Traditional  | NA18517 | G                | G | G              | A | G                  |   |
| 2   | 234427637 | 234427637 | Microdroplet | NA18505 | C                | C | C              | C | T                  |   |
| 2   | 234427637 |           | Traditional  | NA18505 | C                | C | C              | C | T                  |   |
| 2   | 234427663 | 234427663 | Microdroplet | NA11832 | C                | C | C              | G | G                  |   |
| 2   | 234427663 |           | Microdroplet | NA11992 | C                | C | C              | C | G                  |   |
| 2   | 234427663 |           | Microdroplet | NA12006 | C                | C | C              | C | G                  |   |
| 2   | 234427663 |           | Traditional  | NA11832 | C                | C | C              | G | G                  |   |
| 2   | 234427663 |           | Traditional  | NA11992 | C                | C | C              | C | G                  |   |
| 2   | 234427663 |           | Traditional  | NA12006 | C                | C | C              | C | G                  |   |
| 2   | 234427685 | 234427685 | Microdroplet | NA11832 | C                | C | C              | C | G                  |   |
| 2   | 234427685 |           | Traditional  | NA11832 | C                | C | C              | C | G                  |   |
| 2   | 234511046 | 234511046 | Traditional  | NA11832 | C                | C | C              | A | C                  |   |
| 2   | 234537961 | 234537961 | Microdroplet | NA11992 | G                | G | G              | A | G                  |   |
| 2   | 234537961 |           | Microdroplet | NA12006 | G                | G | G              | A | G                  |   |
| 2   | 234537961 |           | Microdroplet | NA18517 | G                | G | G              | A | G                  |   |
| 2   | 234537961 |           | Traditional  | NA11992 | G                | G | G              | A | G                  |   |
| 2   | 234537961 |           | Traditional  | NA18517 | G                | G | G              | A | G                  |   |
| 2   | 234542947 | 234542947 | Traditional  | NA12006 | A                | A | A              | A | G                  |   |
| 2   | 234542947 |           | Traditional  | NA18505 | A                | A | A              | A | G                  |   |
| 2   | 234542947 |           | Traditional  | NA18517 | A                | A | A              | A | G                  |   |
| 7   | 27101313  | 27101313  | Microdroplet | NA18505 | A                | A | A              | T | T                  |   |
| 7   | 27101313  |           | Traditional  | NA18505 | A                | A | A              | T | T                  |   |
| 7   | 27101883  | 27101883  | Traditional  | NA18517 | C                | C | C              | C | G                  |   |
| 7   | 27106771  | 27106771  | Microdroplet | NA18517 | C                | C | C              | A | C                  |   |
| 7   | 27113998  | 27113998  | Microdroplet | NA12006 | C                | C | C              | A | C                  |   |
| 7   | 27114800  | 27114800  | Microdroplet | NA12006 | G                | G | G              | C | G                  |   |
| 7   | 27114800  |           | Traditional  | NA12006 | G                | G | G              | C | G                  |   |
| 7   | 27136142  | 27136142  | Microdroplet | NA11832 | T                | T | T              | C | C                  |   |
| 7   | 27136142  |           | Microdroplet | NA11992 | T                | T | T              | C | C                  |   |
| 7   | 27136142  |           | Microdroplet | NA12006 | T                | T | T              | C | C                  |   |
| 7   | 27136142  |           | Microdroplet | NA18505 | T                | T | T              | C | C                  |   |
| 7   | 27136142  |           | Microdroplet | NA18517 | T                | T | T              | C | C                  |   |
| 7   | 27136142  |           | Traditional  | NA11832 | T                | T | T              | C | C                  |   |
| 7   | 27136142  |           | Traditional  | NA11992 | T                | T | T              | C | C                  |   |
| 7   | 27136142  |           | Traditional  | NA12006 | T                | T | T              | C | C                  |   |
| 7   | 27136142  |           | Traditional  | NA18505 | T                | T | T              | C | C                  |   |
| 7   | 27136142  |           | Traditional  | NA18517 | T                | T | T              | C | C                  |   |
| 7   | 27136459  | 27136459  | Microdroplet | NA11832 | A                | A | A              | G | G                  |   |
| 7   | 27136459  |           | Microdroplet | NA11992 | A                | A | A              | G | G                  |   |
| 7   | 27136459  |           | Microdroplet | NA12006 | A                | A | A              | G | G                  |   |
| 7   | 27136459  |           | Microdroplet | NA18505 | A                | A | A              | G | G                  |   |
| 7   | 27136459  |           | Microdroplet | NA18517 | A                | A | A              | G | G                  |   |
| 7   | 27136459  |           | Traditional  | NA11832 | A                | A | A              | G | G                  |   |
| 7   | 27136459  |           | Traditional  | NA11992 | A                | A | A              | G | G                  |   |
| 7   | 27136459  |           | Traditional  | NA12006 | A                | A | A              | G | G                  |   |
| 7   | 27136459  |           | Traditional  | NA18505 | A                | A | A              | G | G                  |   |
| 7   | 27136459  |           | Traditional  | NA18517 | A                | A | A              | G | G                  |   |
| 7   | 27136670  | 27136670  | Microdroplet | NA11832 | T                | T | T              | G | G                  |   |
| 7   | 27136670  |           | Microdroplet | NA11992 | T                | T | T              | G | G                  |   |
| 7   | 27136670  |           | Microdroplet | NA12006 | T                | T | T              | G | G                  |   |
| 7   | 27136670  |           | Microdroplet | NA18505 | T                | T | T              | G | G                  |   |
| 7   | 27136670  |           | Microdroplet | NA18517 | T                | T | T              | G | G                  |   |
| 7   | 27136670  |           | Traditional  | NA11832 | T                | T | T              | G | G                  |   |
| 7   | 27136670  |           | Traditional  | NA11992 | T                | T | T              | G | G                  |   |
| 7   | 27136670  |           | Traditional  | NA12006 | T                | T | T              | G | G                  |   |
| 7   | 27136670  |           | Traditional  | NA18505 | T                | T | T              | G | G                  |   |
| 7   | 27136670  |           | Traditional  | NA18517 | T                | T | T              | G | G                  |   |
| 7   | 27149158  | 27149158  | Microdroplet | NA18505 | G                | G | G              | A | G                  |   |
| 7   | 27149158  |           | Microdroplet | NA18517 | G                | G | G              | A | G                  |   |
| 7   | 27149158  |           | Traditional  | NA18505 | G                | G | G              | A | G                  |   |
| 7   | 27149158  |           | Traditional  | NA18517 | G                | G | G              | A | G                  |   |
| 7   | 27152045  | 27152045  | Microdroplet | NA18505 | G                | G | G              | A | G                  |   |
| 7   | 27152045  |           | Microdroplet | NA18517 | G                | G | G              | A | G                  |   |
| 7   | 27152045  |           | Traditional  | NA18505 | G                | G | G              | A | G                  |   |
| 7   | 27152045  |           | Traditional  | NA18517 | G                | G | G              | A | G                  |   |
| 7   | 27162519  | 27162519  | Microdroplet | NA12006 | G                | G | G              | A | G                  |   |
| 7   | 27162519  |           | Traditional  | NA12006 | G                | G | G              | A | G                  |   |
| 7   | 27171257  | 27171257  | Microdroplet | NA11992 | C                | C | C              | A | C                  |   |
| 7   | 27171257  |           | Microdroplet | NA12006 | C                | C | C              | A | C                  |   |
| 7   | 27171257  |           | Traditional  | NA11992 | C                | C | C              | A | C                  |   |
| 7   | 27171257  |           | Traditional  | NA12006 | C                | C | C              | A | C                  |   |
| 7   | 27171684  | 27171684  | Traditional  | NA18517 | C                | C | C              | C | G                  |   |
| 7   | 27205216  | 27205216  | Microdroplet | NA11832 | C                | C | C              | G | G                  |   |
| 7   | 27205216  |           | Microdroplet | NA11992 | C                | C | C              | G | G                  |   |
| 7   | 27205216  |           | Microdroplet | NA12006 | C                | C | C              | G | G                  |   |
| 7   | 27205216  |           | Microdroplet | NA18505 | C                | C | C              | G | G                  |   |
| 7   | 27205216  |           | Microdroplet | NA18517 | C                | C | C              | G | G                  |   |
| 7   | 27205216  |           | Traditional  | NA11832 | C                | C | C              | G | G                  |   |
| 7   | 27205216  |           | Traditional  | NA11992 | C                | C | C              | G | G                  |   |
| 7   | 27205216  |           | Traditional  | NA12006 | C                | C | C              | G | G                  |   |
| 7   | 27205216  |           | Traditional  | NA18505 | C                | C | C              | G | G                  |   |
| 7   | 27205216  |           | Traditional  | NA18517 | C                | C | C              | G | G                  |   |
| 7   | 27205718  | 27205718  | Microdroplet | NA18517 | C                | C | C              | T | T                  |   |
| 7   | 27205718  |           | Traditional  | NA18517 | C                | C | C              | C | T                  |   |
| 7   | 27205726  | 27205726  | Traditional  | NA18517 | G                | G | G              | G | T                  |   |

|   |           |           |              |         |   |   |   |   |   |
|---|-----------|-----------|--------------|---------|---|---|---|---|---|
| 7 | 27206075  | 27206075  | Microdroplet | NA18517 | C | C | C | C | T |
| 7 | 27206075  |           | Traditional  | NA18517 | C | C | C | C | T |
| 7 | 27249029  | 27249029  | Traditional  | NA11992 | G | G | G | A | G |
| 7 | 27249654  | 27249654  | Microdroplet | NA11992 | C | C | C | C | T |
| 7 | 27249654  |           | Traditional  | NA11992 | C | C | C | C | T |
| 7 | 27252215  | 27252215  | Microdroplet | NA18505 | A | A | A | A | C |
| 7 | 27252215  |           | Traditional  | NA18505 | A | A | A | A | C |
| 7 | 89631723  | 89631723  | Traditional  | NA11832 | G | G | G | G | T |
| 7 | 89699558  | 89699558  | Traditional  | NA11992 | G | G | G | G | T |
| 7 | 89729133  | 89729133  | Microdroplet | NA12006 | C | C | C | A | C |
| 7 | 89744582  | 89744582  | Microdroplet | NA18505 | C | C | C | A | C |
| 7 | 89753393  | 89753393  | Microdroplet | NA11992 | C | C | C | A | C |
| 7 | 89753393  |           | Traditional  | NA18517 | C | C | C | A | C |
| 7 | 89774976  | 89774976  | Microdroplet | NA18505 | G | G | G | A | G |
| 7 | 89839432  | 89839432  | Microdroplet | NA12006 | G | G | G | C | G |
| 7 | 89839432  |           | Traditional  | NA12006 | G | G | G | C | G |
| 7 | 89852431  | 89852431  | Microdroplet | NA18517 | C | C | C | A | C |
| 9 | 130738637 | 130738637 | Microdroplet | NA18505 | G | G | G | A | G |
| 9 | 130738637 |           | Traditional  | NA18505 | G | G | G | A | G |
| 9 | 130749838 | 130749838 | Microdroplet | NA18505 | G | G | G | A | G |
| 9 | 130749838 |           | Traditional  | NA18505 | G | G | G | A | G |
| 9 | 130749946 | 130749946 | Microdroplet | NA18505 | A | A | A | A | G |
| 9 | 130749946 |           | Traditional  | NA18505 | A | A | A | A | G |
| 9 | 130749988 | 130749988 | Microdroplet | NA18517 | G | G | G | A | G |
| 9 | 130749988 |           | Traditional  | NA18517 | G | G | G | A | G |
| 9 | 130782645 | 130782645 | Microdroplet | NA18517 | T | T | T | C | T |
| 9 | 130782645 |           | Traditional  | NA18517 | T | T | T | C | T |
| 9 | 130788934 | 130788934 | Microdroplet | NA18517 | T | T | T | C | T |
| 9 | 130788934 |           | Traditional  | NA18517 | T | T | T | C | T |
| 9 | 130800813 | 130800813 | Microdroplet | NA11992 | A | A | A | A | T |
| 9 | 130800813 |           | Traditional  | NA11992 | A | A | A | A | T |
| 9 | 130803835 | 130803835 | Microdroplet | NA18517 | A | A | A | A | C |
| 9 | 130803835 |           | Traditional  | NA18517 | A | A | A | A | C |
| 9 | 130808083 | 130808083 | Microdroplet | NA18517 | G | G | G | A | G |
| 9 | 130808083 |           | Traditional  | NA18517 | G | G | G | A | G |
| 9 | 130811326 | 130811326 | Microdroplet | NA11832 | C | C | C | C | T |
| 9 | 130811326 |           | Microdroplet | NA11992 | C | C | C | T | T |
| 9 | 130811326 |           | Microdroplet | NA12006 | C | C | C | T | T |
| 9 | 130811326 |           | Traditional  | NA11832 | C | C | C | C | T |
| 9 | 130811326 |           | Traditional  | NA11992 | C | C | C | T | T |
| 9 | 130811326 |           | Traditional  | NA12006 | C | C | C | T | T |
| 9 | 130830351 | 130830351 | Microdroplet | NA18517 | G | G | G | C | G |
| 9 | 130830352 | 130830352 | Microdroplet | NA11832 | C | C | C | C | T |
| 9 | 130830352 |           | Microdroplet | NA11992 | C | C | C | T | T |
| 9 | 130830352 |           | Microdroplet | NA12006 | C | C | C | T | T |
| 9 | 130830352 |           | Microdroplet | NA18517 | C | C | C | C | T |
| 9 | 130830352 |           | Traditional  | NA11992 | C | C | C | T | T |
| 9 | 130830454 | 130830454 | Microdroplet | NA11832 | T | T | T | G | G |
| 9 | 130830454 |           | Microdroplet | NA11992 | T | T | T | G | G |
| 9 | 130830454 |           | Microdroplet | NA12006 | T | T | T | G | G |
| 9 | 130830454 |           | Microdroplet | NA18505 | T | T | T | G | G |
| 9 | 130830454 |           | Microdroplet | NA18517 | T | T | T | G | G |
| 9 | 130830454 |           | Traditional  | NA11992 | T | T | T | G | G |
| 9 | 130851869 | 130851869 | Microdroplet | NA18517 | C | C | C | C | T |
| 9 | 130851869 |           | Traditional  | NA18517 | C | C | C | C | T |
| 9 | 130887224 | 130887224 | Microdroplet | NA18517 | G | G | G | A | G |
| 9 | 130887224 |           | Traditional  | NA18517 | G | G | G | A | G |
| 9 | 130888884 | 130888884 | Microdroplet | NA18517 | C | C | C | C | T |
| 9 | 130888884 |           | Traditional  | NA18517 | C | C | C | C | T |
| 9 | 130897438 | 130897438 | Microdroplet | NA11832 | G | G | G | A | G |
| 9 | 130897438 |           | Traditional  | NA11832 | G | G | G | A | G |
| 9 | 130900088 | 130900088 | Microdroplet | NA18505 | C | C | C | C | T |
| 9 | 130900088 |           | Traditional  | NA18505 | C | C | C | C | T |
| 9 | 130902602 | 130902602 | Microdroplet | NA11832 | G | G | G | A | A |
| 9 | 130902602 |           | Microdroplet | NA11992 | G | G | G | A | A |
| 9 | 130902602 |           | Microdroplet | NA12006 | G | G | G | A | A |
| 9 | 130902602 |           | Microdroplet | NA18505 | G | G | G | A | A |
| 9 | 130902602 |           | Traditional  | NA11832 | G | G | G | A | A |
| 9 | 130902602 |           | Traditional  | NA11992 | G | G | G | A | A |
| 9 | 130902602 |           | Traditional  | NA12006 | G | G | G | A | A |
| 9 | 130902602 |           | Traditional  | NA18505 | G | G | G | A | A |
| 9 | 130902815 | 130902815 | Microdroplet | NA18505 | C | C | C | C | T |
| 9 | 130902815 |           | Traditional  | NA18505 | C | C | C | C | T |
| 9 | 130922582 | 130922582 | Microdroplet | NA11832 | T | T | T | C | C |
| 9 | 130922582 |           | Microdroplet | NA11992 | T | T | T | C | C |
| 9 | 130922582 |           | Microdroplet | NA12006 | T | T | T | C | C |
| 9 | 130922582 |           | Microdroplet | NA18505 | T | T | T | C | C |
| 9 | 130922582 |           | Microdroplet | NA18517 | T | T | T | C | C |
| 9 | 130922582 |           | Traditional  | NA11832 | T | T | T | C | C |
| 9 | 130922582 |           | Traditional  | NA11992 | T | T | T | C | C |
| 9 | 130922582 |           | Traditional  | NA12006 | T | T | T | C | C |
| 9 | 130922582 |           | Traditional  | NA18505 | T | T | T | C | C |
| 9 | 130922582 |           | Traditional  | NA18517 | T | T | T | C | C |
| 9 | 130925100 | 130925100 | Traditional  | NA18517 | G | G | G | A | G |
| 9 | 130938701 | 130938701 | Microdroplet | NA18505 | A | A | A | G | G |
| 9 | 130938701 |           | Microdroplet | NA18517 | A | A | A | G | G |
| 9 | 130938701 |           | Traditional  | NA18505 | A | A | A | G | G |
| 9 | 130938701 |           | Traditional  | NA18517 | A | A | A | G | G |
| 9 | 130939667 | 130939667 | Microdroplet | NA11832 | T | T | T | C | C |
| 9 | 130939667 |           | Microdroplet | NA11992 | T | T | T | C | C |
| 9 | 130939667 |           | Microdroplet | NA12006 | T | T | T | C | C |
| 9 | 130939667 |           | Traditional  | NA11832 | T | T | T | C | C |
| 9 | 130939667 |           | Traditional  | NA11992 | T | T | T | C | C |
| 9 | 130939667 |           | Traditional  | NA12006 | T | T | T | C | C |

a - Frequency of reads mapped which the reference allele b - Variant calls between traditional and microdroplet PCR differed. For a

**Supplemental Table 7. Scale up phase discordant variants between sequence data and HapMap genotypes.**

| Chr | Position  | Reference Allele | HapMap Alleles |   | Sequencing Alleles |         |       |       | Illumina GAI    |                  |                             |                          |                 | Roche 454                        |                |                          |                 |
|-----|-----------|------------------|----------------|---|--------------------|---------|-------|-------|-----------------|------------------|-----------------------------|--------------------------|-----------------|----------------------------------|----------------|--------------------------|-----------------|
|     |           |                  | A              | B | GA II A            | GA II B | 454 A | 454 B | Variant Quality | Neighbor Quality | Base Frequency <sup>a</sup> | Base Called <sup>b</sup> | Base Discrepant | Variant Probability <sup>a</sup> | Base Frequency | Base Called <sup>b</sup> | Base Discrepant |
| 1   | 35431339  | G                | C              | C | G                  | G       | G     | G     | 255             | 62               | 99.05                       | yes                      | yes             | -                                | 100            | yes                      | yes             |
| 1   | 159911794 | G                | G              | G | G                  | G       | C     | G     | 255             | 62               | 98.76                       | yes                      | no              | 2.04E-27                         | 68.57          | yes                      | yes             |
| 1   | 226499840 | A                | A              | G | A                  | A       | A     | A     | 230             | 62               | 99.1                        | yes                      | yes             | -                                | 100            | yes                      | yes             |
| 1   | 226510920 | T                | G              | G | T                  | T       | T     | T     | 253             | 62               | 100                         | yes                      | yes             | -                                | 100            | yes                      | yes             |
| 3   | 12398113  | G                | G              | G | C                  | G       | C     | G     | 165             | 62               | 48.1                        | yes                      | yes             | 6.61E-23                         | 47.3           | yes                      | yes             |
| 3   | 37510988  | C                | G              | G | C                  | G       | C     | G     | 189             | 62               | 52.05                       | yes                      | yes             | 2.86E-10                         | 43.37          | yes                      | yes             |
| 3   | 136127326 | G                | T              | T | T                  | T       | G     | T     | 255             | 62               | 0                           | yes                      | no              | 3.04E-09                         | 33.33          | yes                      | yes             |
| 3   | 185781762 | G                | A              | G | A                  | G       | A     | A     | 53              | 62               | 22.94                       | yes                      | no              | 1.03E-14                         | 17.14          | yes                      | yes             |
| 5   | 176828423 | G                | G              | G | A                  | G       | A     | G     | 165             | 62               | 57.14                       | yes                      | yes             | 3.36E-31                         | 47.86          | yes                      | yes             |
| 6   | 30967283  | C                | C              | G | C                  | C       | C     | C     | 255             | 62               | 98.69                       | yes                      | yes             | -                                | 100            | yes                      | yes             |
| 6   | 33051323  | C                | C              | T | C                  | C       | C     | C     | 241             | 62               | 100                         | yes                      | yes             | -                                | 100            | yes                      | yes             |
| 6   | 44326098  | A                | A              | G | A                  | A       | A     | G     | 63              | 62               | 72                          | yes                      | yes             | 1.73E-08                         | 34.62          | yes                      | no              |
| 6   | 109091842 | T                | C              | T | T                  | T       | C     | T     | 255             | 62               | 100                         | yes                      | yes             | 3.63E-25                         | 72.19          | yes                      | no              |
| 6   | 160401527 | T                | C              | C | C                  | T       | C     | T     | 182             | 62               | 52.52                       | yes                      | yes             | 8.73E-19                         | 60.94          | yes                      | yes             |
| 7   | 5993514   | G                | G              | G | A                  | G       | A     | G     | 62              | 62               | 57.36                       | yes                      | yes             | 8.45E-09                         | 75             | yes                      | yes             |
| 7   | 100248593 | A                | A              | A | A                  | G       | -     | -     | 171             | 62               | 50.85                       | yes                      | yes             | 1.41E-05                         | 52.38          | no                       | -               |
| 7   | 150795122 | A                | G              | G | A                  | A       | A     | A     | 255             | 62               | 100                         | yes                      | yes             | -                                | 100            | yes                      | yes             |
| 9   | 133054166 | T                | C              | C | C                  | C       | C     | T     | 255             | 62               | 0                           | yes                      | no              | 1.07E-32                         | 28             | yes                      | yes             |
| 10  | 76458866  | C                | C              | T | -                  | -       | C     | C     | 1               | 62               | 81.93                       | no                       | -               | 3.27E-01                         | 94.12          | yes                      | yes             |
| 11  | 85369990  | A                | C              | C | A                  | C       | A     | C     | 255             | 62               | 48.13                       | yes                      | yes             | 2.20E-27                         | 39.34          | yes                      | yes             |
| 11  | 116582149 | C                | C              | C | C                  | C       | C     | T     | 255             | 62               | 99.3                        | yes                      | no              | 1.92E-06                         | 63.16          | yes                      | yes             |
| 11  | 116582159 | G                | A              | A | G                  | G       | -     | -     | 255             | 62               | 97.76                       | yes                      | yes             | 2.47E-04                         | 63.16          | no                       | -               |
| 11  | 116582219 | A                | C              | C | A                  | A       | A     | C     | 255             | 62               | 100                         | yes                      | yes             | 1.84E-09                         | 61.54          | yes                      | yes             |
| 12  | 4253419   | T                | C              | C | C                  | C       | C     | T     | 255             | 62               | 1.09                        | yes                      | no              | 1.01E-06                         | 25             | yes                      | yes             |
| 15  | 82279640  | A                | G              | G | G                  | G       | A     | G     | 255             | 62               | 0.46                        | yes                      | no              | 8.30E-08                         | 45.1           | yes                      | yes             |
| 17  | 21142143  | T                | T              | T | C                  | T       | C     | T     | 162             | 62               | 60.34                       | yes                      | yes             | 4.15E-18                         | 47.37          | yes                      | yes             |
| 17  | 21142312  | T                | T              | T | C                  | T       | C     | T     | 175             | 62               | 44.96                       | yes                      | yes             | 1.53E-20                         | 55             | yes                      | yes             |
| 17  | 21144883  | G                | G              | G | G                  | G       | C     | G     | 97              | 62               | 83.97                       | yes                      | no              | 7.49E-13                         | 77.06          | yes                      | yes             |
| 17  | 21157990  | A                | A              | A | A                  | G       | A     | G     | 120             | 62               | 68.25                       | yes                      | yes             | 7.88E-25                         | 42.68          | yes                      | yes             |
| 17  | 21158106  | G                | G              | G | A                  | G       | A     | G     | 192             | 62               | 51.59                       | yes                      | yes             | 2.17E-65                         | 42.42          | yes                      | yes             |
| 18  | 7024464   | T                | A              | T | A                  | A       | A     | A     | 255             | 62               | 0.67                        | yes                      | yes             | 6.99E-12                         | 0              | yes                      | yes             |
| 19  | 5953701   | C                | C              | C | C                  | T       | C     | T     | 168             | 62               | 45.28                       | yes                      | yes             | 5.61E-09                         | 30             | yes                      | yes             |
| 19  | 50563876  | C                | T              | T | C                  | T       | T     | T     | 159             | 62               | 61.73                       | yes                      | yes             | 6.72E-69                         | 0.96           | yes                      | no              |
| 20  | 35448117  | G                | G              | G | A                  | G       | A     | G     | 181             | 62               | 53.96                       | yes                      | yes             | 6.04E-16                         | 46.94          | yes                      | yes             |
| 20  | 35464469  | C                | T              | T | C                  | T       | C     | T     | 176             | 62               | 45.86                       | yes                      | yes             | 6.52E-11                         | 51.16          | yes                      | yes             |
| X   | 107863596 | G                | C              | G | C                  | G       | G     | G     | 175             | 62               | 54.29                       | yes                      | no              | 5.31E-11                         | 80.56          | yes                      | yes             |

a - Frequency of reads mapped which the reference allele. b - Filter criteria for variant calling explained are explained in the supplemental methods

**Supplemental Table 8. Comparison of enrichment methods for targeted sequencing.** Please see Supplemental Discussion starting on page 9 for supporting text.

| Method                              | Targeted Bases | Fraction of Reads On Target |                    | Coverage of targeted bases |                              | Concordance             | Uniformity of coverage              |                                         |
|-------------------------------------|----------------|-----------------------------|--------------------|----------------------------|------------------------------|-------------------------|-------------------------------------|-----------------------------------------|
|                                     |                | All Reads                   | Uniquely Mapping   | ≥ 1 read                   | Passed for Variant Detection |                         |                                     |                                         |
| Microdroplet PCR                    | 1.35 Mb        | 64.2%                       | 79.2%              | 99.8%                      | 94.5%                        | 98.8%                   | 96.6% within 1/5 the mean (25-fold) |                                         |
| MIP <sup>1</sup>                    | Shotgun        | 6.5 Mb                      | 58.4%              | 99.0%                      | 85.0%                        | 58.8%                   | 99.7 / 96.4 <sup>2</sup>            | N/A                                     |
|                                     | End Sequence   | 1.4 Mb <sup>3</sup>         | 66.3% <sup>4</sup> | 73.1%                      | 98.0%                        | 75.0%                   | 99.7%                               | 58% within tenfold, 88% within 100-fold |
| Solution Hybridization <sup>5</sup> | 3.7 Mb         | 53.1% <sup>6</sup>          | 65.2%              | 88.0%                      | 64.0% / 89% <sup>7,8</sup>   | 99.6% / NA <sup>8</sup> | 80% within 1/5 the mean (25-fold)   |                                         |

1 - MIP = Molecular inversion probe. Turner et al. N. Meth 2009. 2 - Concordance reported separately for homozygotes (99.7%) and heterozygotes (96.4%). 3 - 1.4 Mb represents a proportion of 1.7 Mb of the exonic sequence that could be acquired by 76 bp end sequencing 4 - Calculated by multiplying the proportion of the 76 base reads that did not consist of primer sequence (56/76 \* 90.0). 5 - Gnirke et al. N. Biotech 2009 6 - Gnirke et al. mapped 37.7% of all reads. For a fairer assessment we report mapping of filtered reads using methods described in the supplemental discussion. 7 - Gnirke et al. only reported the call rate for exonic sequence (2.5 Mb) and not the entire bait. 8 - The concordance for the GA-II run was not reported, because of this exclusion we have provided call rates for the GA-I (first value) and GA-II runs (second value).
